# Supplementary figures and images for: Prevalence and macrolide resistance of Mycoplasma genitalium from patients seeking sexual health care in Southern Ghana
Source: PubMed Central journal article supplement — BMC Infect Dis. 2024 Sep 16;24:981. doi: 10.1186/s12879-024-09880-2 (PMC11403770; doi:10.1186/s12879-024-09880-2), 2024-09-16

**Trace – Sp\_Speedex**

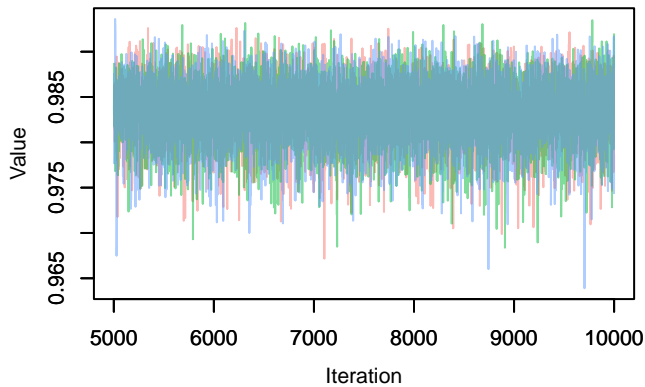

**Density – Sp\_Speedex**

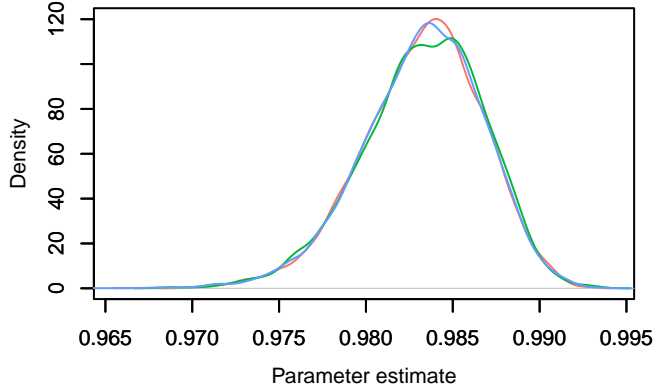

Supplement: 12879_2024_9880_MOESM2_ESM.pdf [file 12879_2024_9880_MOESM2_ESM.pdf]
